# Supplementary material
Source: publisher figshare collection journal article supplement (https://diabetesjournals.figshare.com/articles/dataset/_/13568192)
Supplement: Supplementary file 1 [file 1]

**Supplementary Table 1: Primers for real-time PC**

| <b>Gene</b> | <b>5' sens primers-3'</b> | <b>3' sens primers-5'</b> |
|-------------|---------------------------|---------------------------|
| TNF alpha   | ccaccacgctcttctgtcta      | cacttggtggttgtctacga      |
| IL1 beta    | ctccacctcaatcgacagaa      | gccctcttcattacacagc       |
| PCSK9       | tatagccgcacctcaacgc       | cccgactgtgatgaccttg       |
| LPL         | ccttcactcggatcctctcg      | aggtggacatcggagaactg      |
| RBP4        | agggtgagcagcttccgagtca    | accagagcccagagaaacgacc    |
| b-actine    | atgctccccgggctgtat        | cataggagtcttctgagccattc   |
| ATPase      | tggactcagctacatccggt      | aactcggctccagggcatc       |
