# Supplementary material
Source: publisher figshare collection journal article supplement (https://diabetesjournals.figshare.com/articles/dataset/_/13568192)
Supplement: Supplementary file 2 [file 1]

**Supplementary Figure 1: *Multi-compartmental model for kinetic analysis of ApoB-100 metabolism.***

Compartment 3 represents plasma leucine into which the leucine tracer was injected. Compartment 4 is the delay compartment, representing the time required for the synthesis and secretion of ApoB-100 into the plasma. Compartments 1 and 2 represent plasma VLDL<sub>1</sub>-ApoB-100 and VLDL<sub>1</sub> remnants-ApoB100 respectively. Compartments 11 and 12 represent plasma VLDL<sub>2</sub>-ApoB-100 and VLDL<sub>2</sub> remnants-ApoB100 respectively. Compartments 21 and 22 represent plasma IDL-ApoB100 and IDL remnants-ApoB100 respectively. Compartment 31 represents plasma LDL-ApoB-100.  $k(y,x)$  represents the fractional transfer coefficient from compartment x to compartment y (arrows).
