# Supplementary material
Source: publisher figshare collection journal article supplement (https://diabetesjournals.figshare.com/articles/dataset/_/13568192)
Supplement: Supplementary file 3 [file 1]

|                              | Baseline    | After 6-month treatment with liraglutide | P            |
|------------------------------|-------------|------------------------------------------|--------------|
| <b>VLDL<sub>1</sub></b>      |             |                                          |              |
| • Esterified Cholesterol (%) | 6.1 ± 2.2   | 7.6 ± 4.4                                | 0.61         |
| • Free Cholesterol (%)       | 6.5 ± 0.9   | 4.6 ± 1.7                                | <b>0.021</b> |
| • Triglycerides (%)          | 64.3 ± 5.3  | 66.4 ± 5.1                               | 0.64         |
| • Phospholipids (%)          | 15.5 ± 3.7  | 15.0 ± 1.4                               | 0.87         |
| • Proteins (%)               | 7.6 ± 2.1   | 6.4 ± 0.9                                | 0.20         |
| • EC/TG ratio                | 0.10 ± 0.04 | 0.12 ± 0.08                              | 0.57         |
| <b>VLDL<sub>2</sub></b>      |             |                                          |              |
| • Esterified Cholesterol (%) | 14.9 ± 3.2  | 17.6 ± 4.9                               | 0.13         |
| • Free Cholesterol (%)       | 7.6 ± 0.8   | 7.0 ± 1.6                                | 0.57         |
| • Triglycerides (%)          | 48.2 ± 4.7  | 45.2 ± 6.8                               | 0.11         |
| • Phospholipids (%)          | 17.4 ± 2.2  | 19.3 ± 1.9                               | 0.09         |
| • Proteins (%)               | 11.7 ± 3.8  | 10.8 ± 1.9                               | 0.76         |
| • EC/TG ratio                | 0.31 ± 0.1  | 0.41 ± 0.16                              | <b>0.037</b> |
| <b>IDL</b>                   |             |                                          |              |
| • Esterified Cholesterol (%) | 29.5 ± 3.8  | 32.1 ± 3.8                               | <b>0.028</b> |
| • Free Cholesterol (%)       | 9.1 ± 0.8   | 9.3 ± 2.2                                | 0.44         |
| • Triglycerides (%)          | 26.9 ± 5.5  | 22.1 ± 6.8                               | <b>0.015</b> |
| • Phospholipids (%)          | 19.7 ± 1.7  | 22.2 ± 2.2                               | <b>0.028</b> |
| • Proteins (%)               | 14.6 ± 2.0  | 14.3 ± 2.1                               | 0.75         |
| • EC/TG ratio                | 1.15 ± 0.3  | 1.59 ± 0.3                               | <b>0.009</b> |
| <b>LDL</b>                   |             |                                          |              |
| • Esterified Cholesterol (%) | 44.6 ± 2.0  | 43.5 ± 2.9                               | 0.14         |
| • Free Cholesterol (%)       | 8.9 ± 0.7   | 9.3 ± 0.7                                | 0.28         |
| • Triglycerides (%)          | 7.6 ± 1.3   | 7.6 ± 2.1                                | 0.79         |
| • Phospholipids (%)          | 20.4 ± 1.9  | 22.4 ± 1.2                               | <b>0.022</b> |
| • Proteins (%)               | 18.4 ± 0.9  | 17.2 ± 1.5                               | <b>0.047</b> |
| • EC/TG ratio                | 6.06 ± 1.1  | 6.12 ± 1.6                               | 0.64         |

**Supplementary Table 2:** ApoB100-containing lipoprotein composition in patients before and after 6-month treatment with liraglutide. Data are expressed as mean ± SD. EC: Esterified Cholesterol. TG: Triglycerides
